# Supplementary material for: Adult human cardiac stem cell supplementation effectively increases contractile function and maturation in human engineered cardiac tissues
Source: PubMed Central journal article supplement (PMC6894319; doi:10.1186/s13287-019-1486-4), 2019-12-04

A

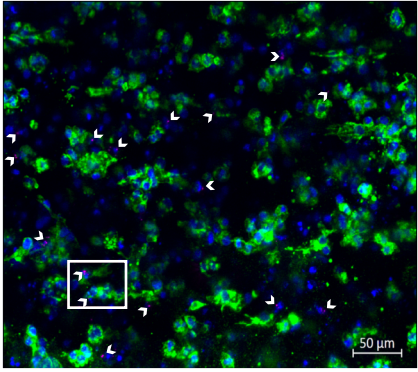

B

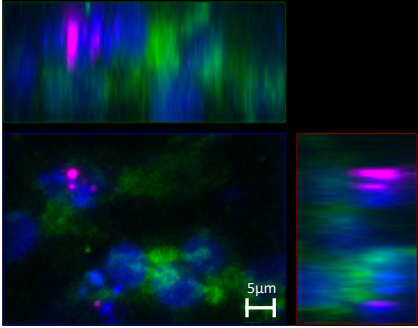

C

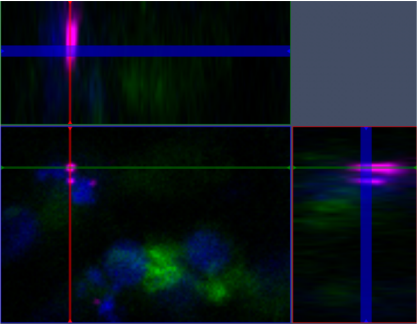

Supplement: 13287_2019_1486_MOESM1_ESM.pdf [file 13287_2019_1486_MOESM1_ESM.pdf]
